# Supplementary material
Source: PubMed Central journal article supplement (PMC3254191)
Supplement: ct200615k_si_001.pdf [file ct200615k_si_001.pdf]

# Protecting High Energy Barriers: A New Equation to Regulate Boost Energy in Accelerated Molecular Dynamics Simulations

*William Sinko<sup>1,†\*</sup>, César Augusto F. de Oliveira<sup>2, 3,†\*</sup>, Levi C. T. Pierce<sup>2</sup> and J. Andrew  
McCammon<sup>1,2,3</sup>*

<sup>1</sup>Biomedical Sciences Program, University of California San Diego, La Jolla, California 92093-0365.

<sup>2</sup>Department of Chemistry & Biochemistry, Department of Pharmacology, and NSF Center for Theoretical Biological Physics, University of California San Diego, La Jolla, California 92093-0365.

<sup>3</sup>Howard Hughes Medical Institute, University of California San Diego, La Jolla, CA 92093-0365.

† *These Authors contributed equally.*

\* *Corresponding Author*

AUTHOR EMAIL ADDRESS: wsinko@ucsd.edu; cesar@mccammon.ucsd.edu

## CORRESPONDING AUTHOR FOOTNOTE

William Sinko and César Augusto F. de Oliveira

Department of Chemistry & Biochemistry

University of California San Diego

9500 Gilman Drive, Mail Code 0365

La Jolla, CA 92093-0365

858-822-1083 (Office)

858-534-4974 (Fax)

TITLE RUNNING HEAD: New Boost Equation for Accelerated MD

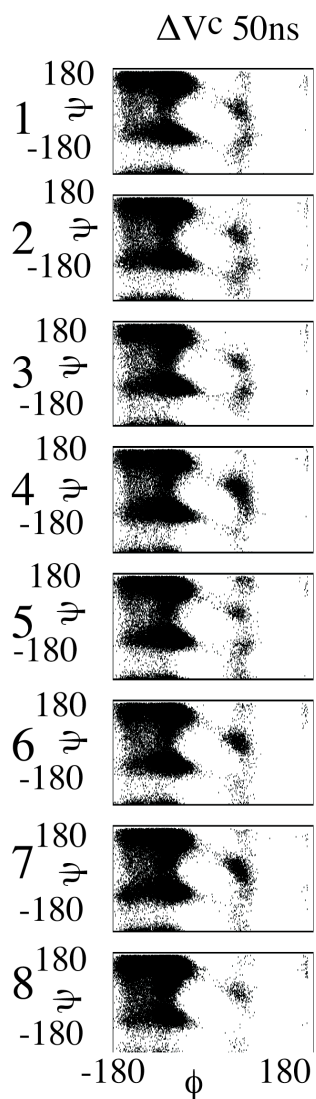

**Figure S1:** Decalanine Phi( $\Phi$ )-Psi( $\Psi$ ) angles distribution obtained from aMD simulations with  $\Delta V^c$ . Parameters were set to  $E_1=74$ ,  $E_2= E_1+35$ ,  $\alpha_2=5$  and  $\alpha_1=15$ . All values are in kcal/mol.

**A**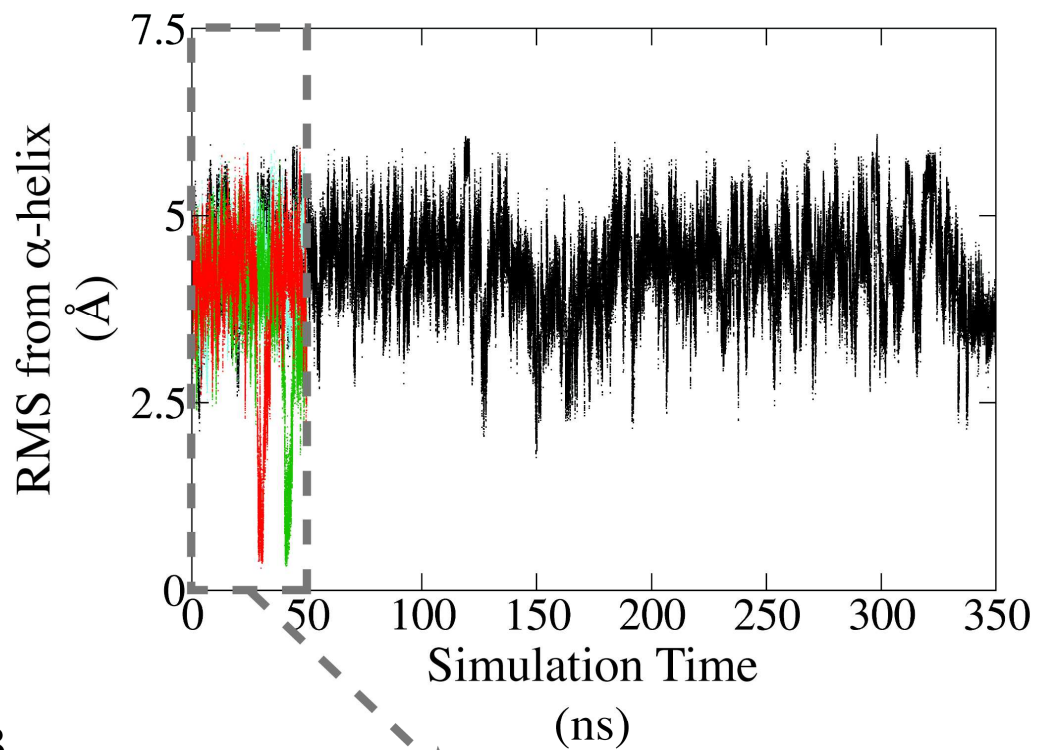**B**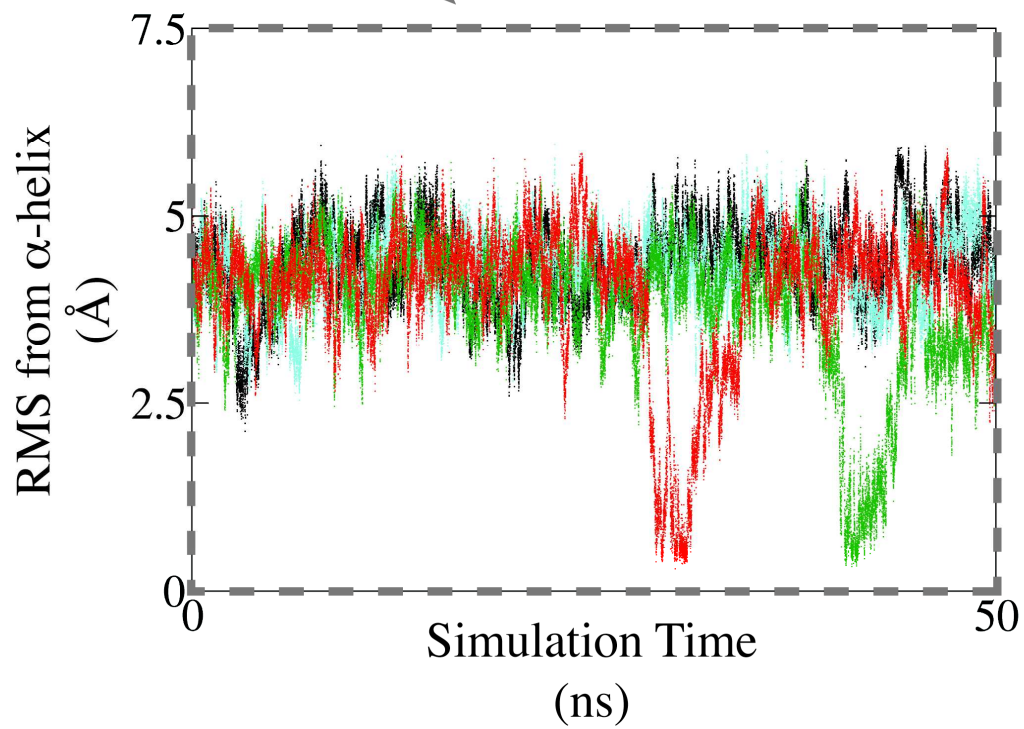

**Figure S2:** Decalinine root mean square (RMS) deviation from  $\alpha$ -helix conformation calculated along: A) 350ns of cMD and 50 ns of aMD simulations, and B) the first 50ns of simulations displayed in (A). Solid lines correspond to MD (black) and aMD with parameters set to  $E_1=74$ ,  $\alpha_2=5$  (all aMD simulations)  $E_2= E_1+25$  and  $\alpha_1=30$  (cyan);  $E_2= E_1+25$  and  $\alpha_1=15$  (red);  $E_2= E_1+35$  and  $\alpha_1=15$  (green). All values are in kcal/mol.
